# Supplementary material for: A new cucurbit[8]uril-based fluorescent receptor for indole derivatives
Source: Royal Society of Chemistry journal article supplement (doi:10.1039/b611559d), 2006-11-07
Supplement: b611559d.pdf [file b611559d.pdf]

# A new cucurbit[8]uril-based fluorescent receptor for indole derivatives

Yonghua Ling, Wei Wang and Angel E. Kaifer\*

*Center for Supramolecular Chemistry and Department of Chemistry, University of Miami, Coral Gables, FL 33124-0431*

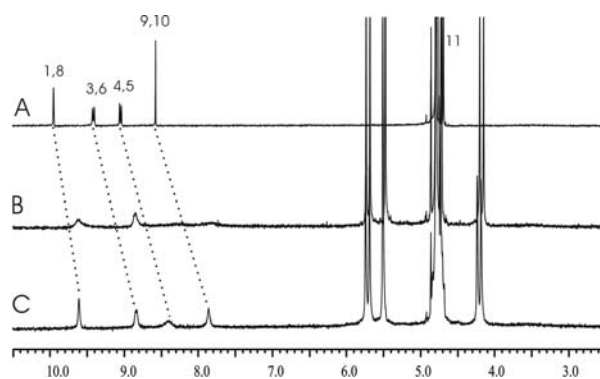

**Figure SI-1.**  $^1\text{H}$  NMR spectrum (0.1MNaCl/D $_2$ O, 300MHz) of 1.0 mM DPT $^{2+}$  in the presence of 0 equiv (A), 0.5 equiv (B) and 1.0 equiv CB8.

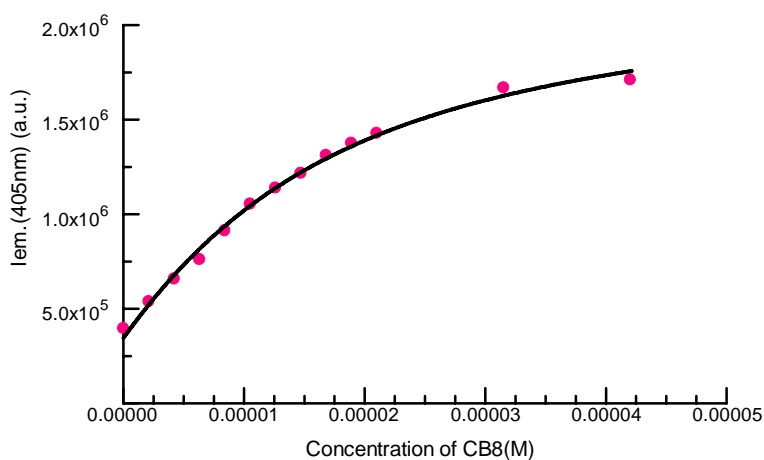

**Figure SI-2.** Fluorescence intensity at 405nm from a solution of 10  $\mu\text{M}$  DPT $^{2+}$  as a function of the added CB8 concentration. The data is best fitted to 1:1 binding model to obtain the equilibrium constant  $K = 7.8 \times 10^4 \text{ M}^{-1}$ .

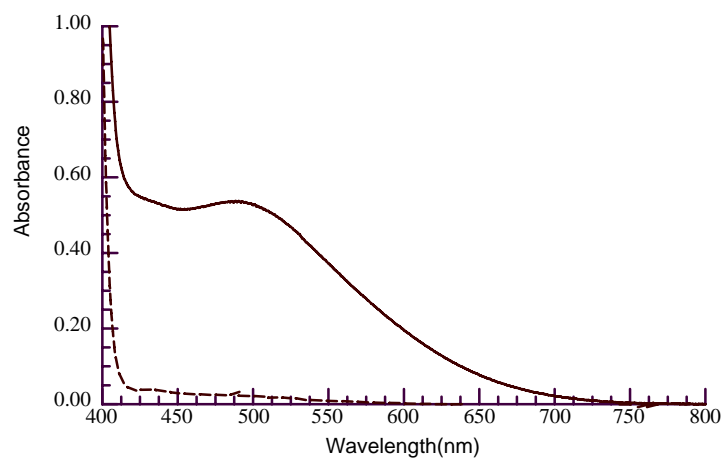

**Figure SI-3.** Electronic absorption spectra obtained in H<sub>2</sub>O for a mixture of 0.52 mM DPT<sup>2+</sup> and 1.05 mM serotonin (dashed line ), and 0.52mM CB8 ,0.54mM DPT<sup>2+</sup> and 1.05mM serotonin mixture (solid line )

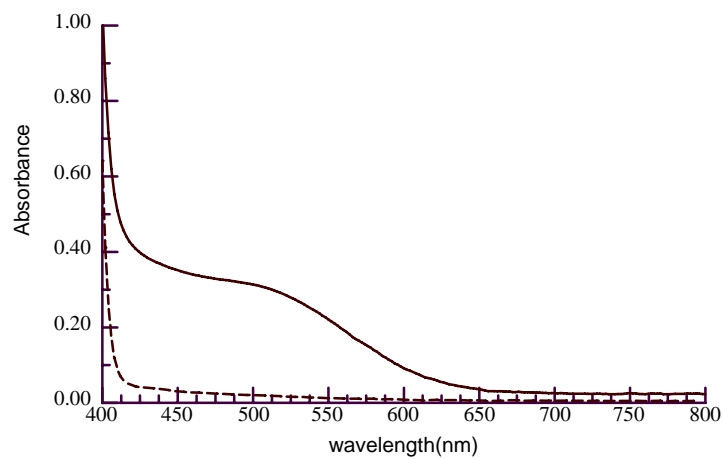

**Figure SI-4.** Electronic absorption spectra obtained in H<sub>2</sub>O for a mixture of 0.5 mM DPT<sup>2+</sup> and 1.73 mM tryptophan (dashed line ), and 0.5 mM CB8 ,0.5 mM DPT<sup>2+</sup> and 1.73mM tryptophan (solid line )

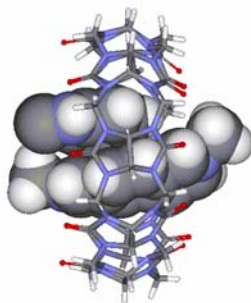

**Figure SI-5.** Energy- minimized structure of the I•DPT<sup>2+</sup>@CB8 ternary complex (PM3)

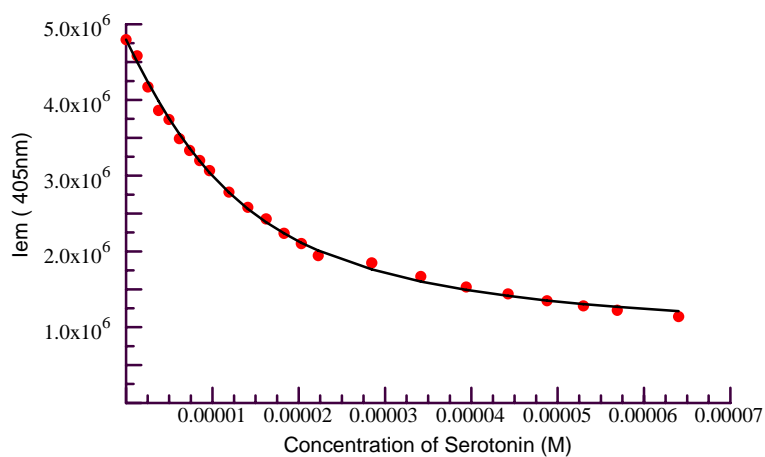

**Figure SI-6.** Fluorescence intensity at 405nm from a solution of 10  $\mu\text{M}$  DPT<sup>2+</sup> and 10  $\mu\text{M}$  CB8 as a function of the added serotonin concentration. The data is best fitted to 1:1 binding model to obtain the equilibrium constant  $K=1.45 \times 10^5 \text{ M}^{-1}$ .

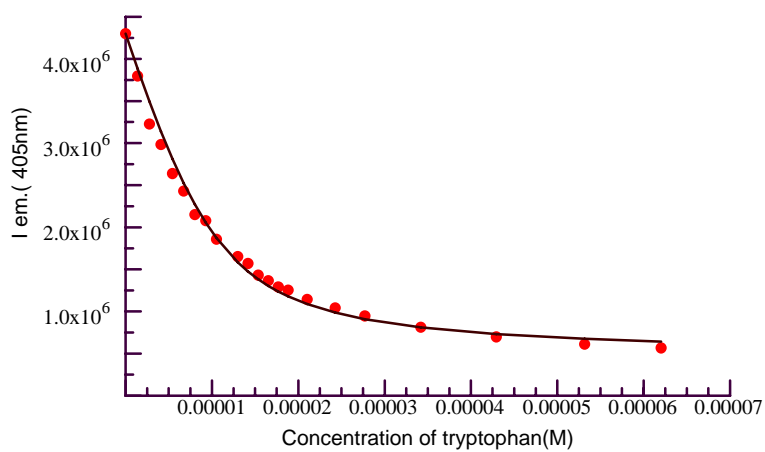

**Figure SI-7.** Fluorescence intensity at 405nm from a solution of 10  $\mu\text{M}$  DPT<sup>2+</sup> and 10  $\mu\text{M}$  CB8 as a function of the added tryptophan concentration. The data is best fitted to 1:1 binding model to obtain the equilibrium constant  $K=4.16 \times 10^5 \text{ M}^{-1}$ .
